# Supplementary material for: Evaluation of Cardiovascular Toxicity of Folic Acid and 6S-5-Methyltetrahydrofolate-Calcium in Early Embryonic Development
Source: MDPI journal article supplement (doi:10.3390/cells11243946), 2022-12-07
Supplement: s1 [file s1]

## Supplemental Information

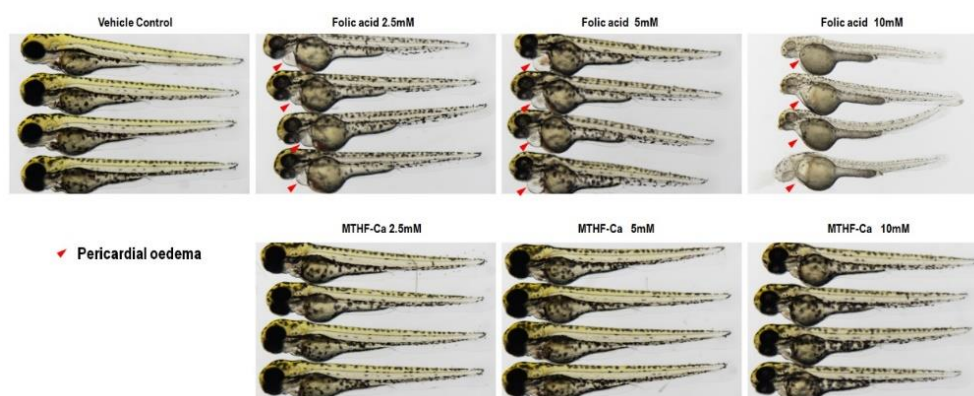

**Figure S1.** FA, but not MTHF-Ca, causes cardiotoxicity in zebrafish. Representative bright-field images of zebrafish embryos at 3 days postfertilization (dpf) treated with vehicle control (fish water), FA (2.5, 5, and 10 mM), or MTHF-Ca (2.5, 5, and 10 mM). Compared with control or MTHF-Ca, FA-treated embryos present pericardial oedema and reduced contractile force ( $n = 40$  each group). FA: folic acid; MTHF-Ca: 6S-5-methyltetrahydrofolate-calcium.

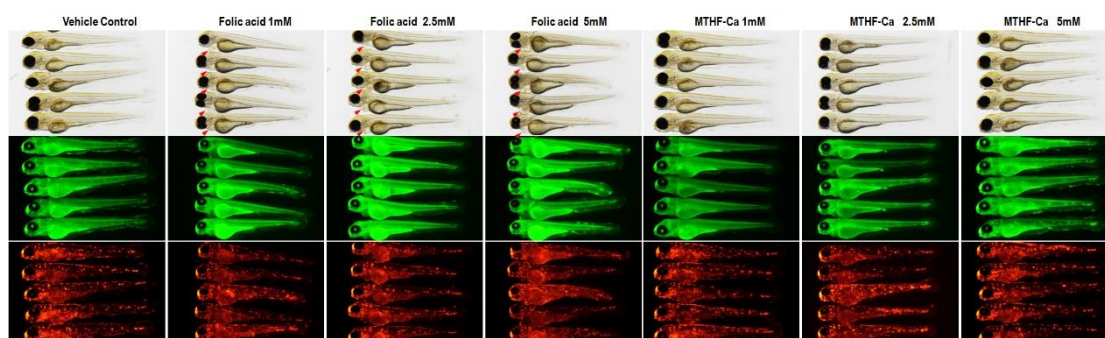

**Figure S2.** FA and MTHF-Ca do not induce heart-specific apoptosis in zebrafish. There is no heart-specific apoptosis induced by either FA or MTHF ( $n = 40$  each group). FA: folic acid; MTHF-Ca: 6S-5-methyltetrahydrofolate-calcium.

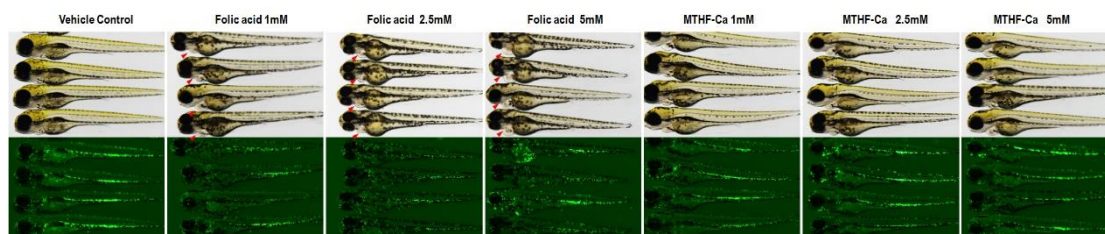

**Figure S3.** FA and MTHF-Ca do not induce heart-specific macrophage migration. There is no heart-specific macrophage migration induced by either FA or MTHF ( $n = 40$  each group). FA: folic acid; MTHF-Ca: 6S-5-methyltetrahydrofolate-calcium.

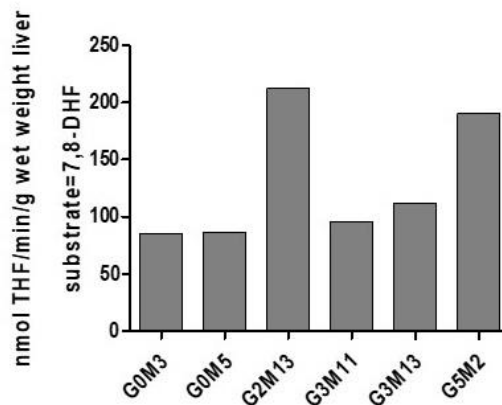

**Figure S4.** DHFR activity in livers of mice is high. A previous study demonstrated that dihydrofolate reductase (DHFR) activity in rat livers is much higher compared to that in humans [8]. In the current study, we found that DHFR activity in the livers of mice was high ( $130.21 \pm 22.97$  nmol/THF/min/g wet weight liver). Livers of female mice were frozen in liquid nitrogen and stored at  $-80^{\circ}\text{C}$ . Prior to the analysis, the liver tissues were homogenized on ice in a homogenizer (Jingxin, Shanghai, China) with 1 mg liver: 20  $\mu\text{L}$  homogenizing buffer (C3228, Sigma-Aldrich, Louis, USA) containing a protease-inhibitor cocktail. The homogenate was centrifuged at 100,000 g for 30 min at  $4^{\circ}\text{C}$ , and the supernatant was removed for DHFR-activity assay. The activity was monitored using a commercial dihydrofolate reductase assay kit according to manufacturer's specifications (CS0340, Sigma-Aldrich, Louis, USA) and read on the microplate reader at 340 nm. Among six female mice, the levels of DHFR activity in the liver, with 7,8-DHF as substrate, varied from 70 to 220 nmol THF/min/g, but was higher than that in humans.

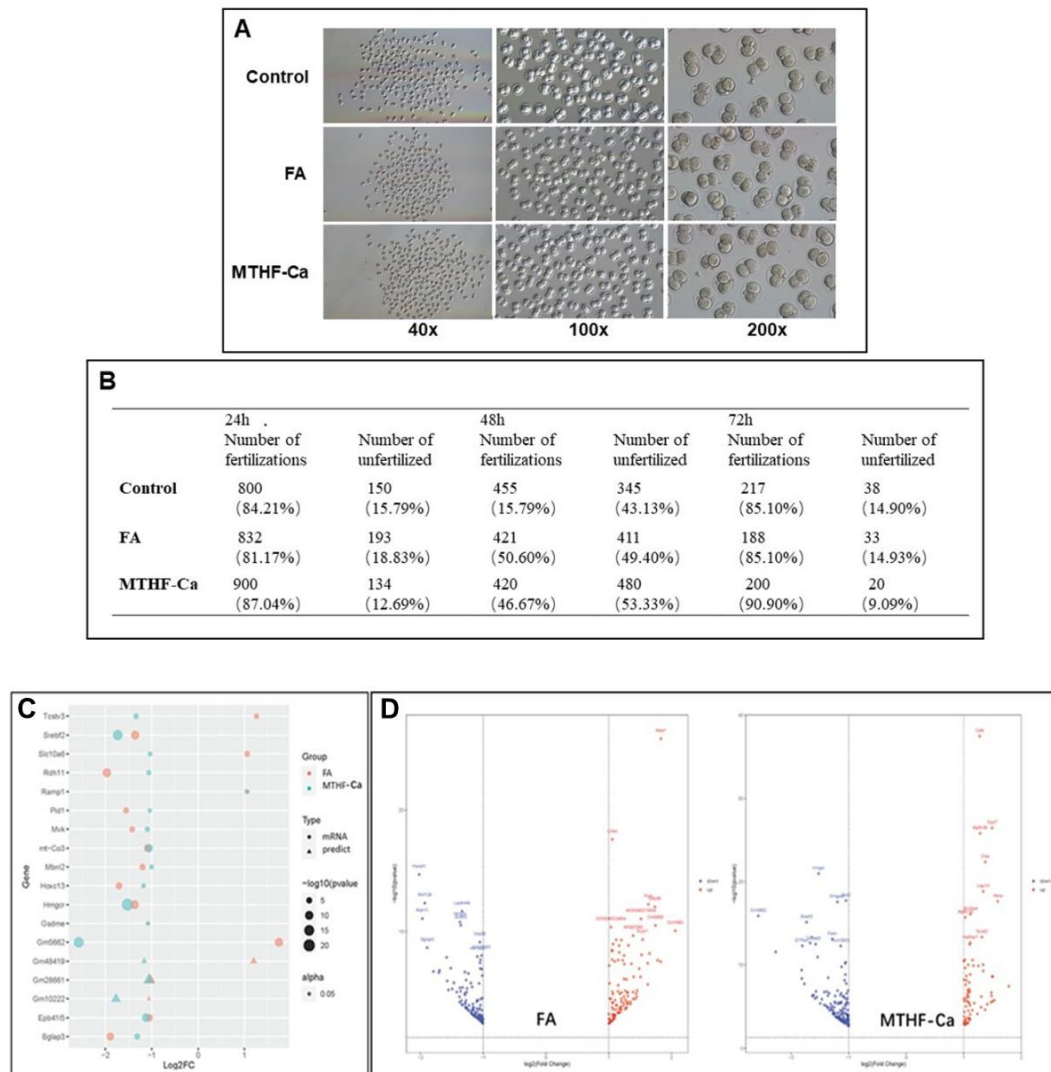

**Figure S5.** Images of mouse blastocysts at 24 h, 48 h, and 72 h, cultured with FA and MTHF-Ca treatment. **(A)** Demonstration of the in vitro fertilized blastocysts of mice cultured with FA and MTHF-Ca for 24, 48 and 72 h. **(B)** Representation of the number of fertilized and unfertilized blastocysts. FA: folic acid; MTHF-Ca: 6S-5-methyltetrahydrofolate-calcium. **(C,D)** To explore the possible molecular mechanisms, mouse blastocysts cultured with FA and MTHF RNA-seq transcriptome analyses (n=10 each group). **(C,D)** Volcano maps of GDE in mouse blastocysts regulated with FA and MTHF. *Gm5662*, *Slc10a6*, and *Tcstv3* were upregulated by FA but downregulated by MTHF.

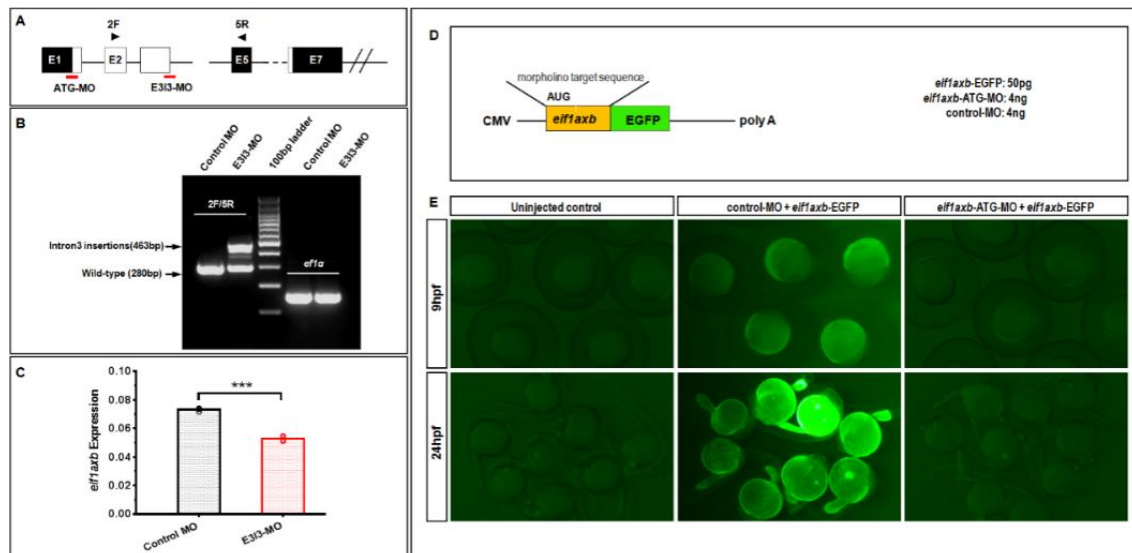

**Figure S6.** Effectiveness of *eiflaxb* knockdown. **(A)** The zebrafish *Eiflaxb* gene was targeted by specific morpholino antisense to prevent proper splicing of exon 3 (E3I3-MO). Primers 2F and 5R interrogate the presence of wild-type (nonmutant) transcripts or those in which intron 3 has been inserted. **(B)** RT-PCR transcript of *Eiflaxb* from control-MO and E3I3-MO morpholino-injected embryos 1 day after fertilization, demonstrating insertion of intron 3. Injection of 4 ng *Eiflaxb* morpholino alters the splicing between exon 3 and intron 3, as revealed by the shift in PCR bands between control and *Eiflaxb* morpholino-injected embryos. **(C)** Quantitative measurements of *Eiflaxb* expression levels measured by qRT-PCR (\*\*\* $P < 0.0001$ ). MO-targeted downregulation of *Eiflaxb*. Samples were collected 1 day postfertilization after introduction of 4 ng MO at the one-cell stage ( $n = 20$ ). **(D)** Schematic diagrams of *Eiflaxb*-EGFP fluorescent reporter mRNAs, the upper one containing the *Eiflaxb*-ATG-MO target sequence (yellow box) fused in-frame with EGFP. **(E)** 50 pg *Eiflaxb*-EGFP injected with a standard control morpholino (4 ng) or *Eiflaxb*-ATG-MO (4 ng). Embryos were photographed at 9 and 24 hours postfertilization. Embryos injected with *Eiflaxb*-GFP plasmid DNA under the driving of CMV promoter showed green fluorescence. When co-injected with *Eiflaxb*-ATG-MO, green fluorescence decreased dramatically.
